# Supplementary material
Source: PubMed Central journal article supplement (PMC10062014)
Supplement: NIHMS1864213-supplement-Supplementary_Material_Fekry.pdf [file NIHMS1864213-supplement-Supplementary_Material_Fekry.pdf]

**Fig. S1**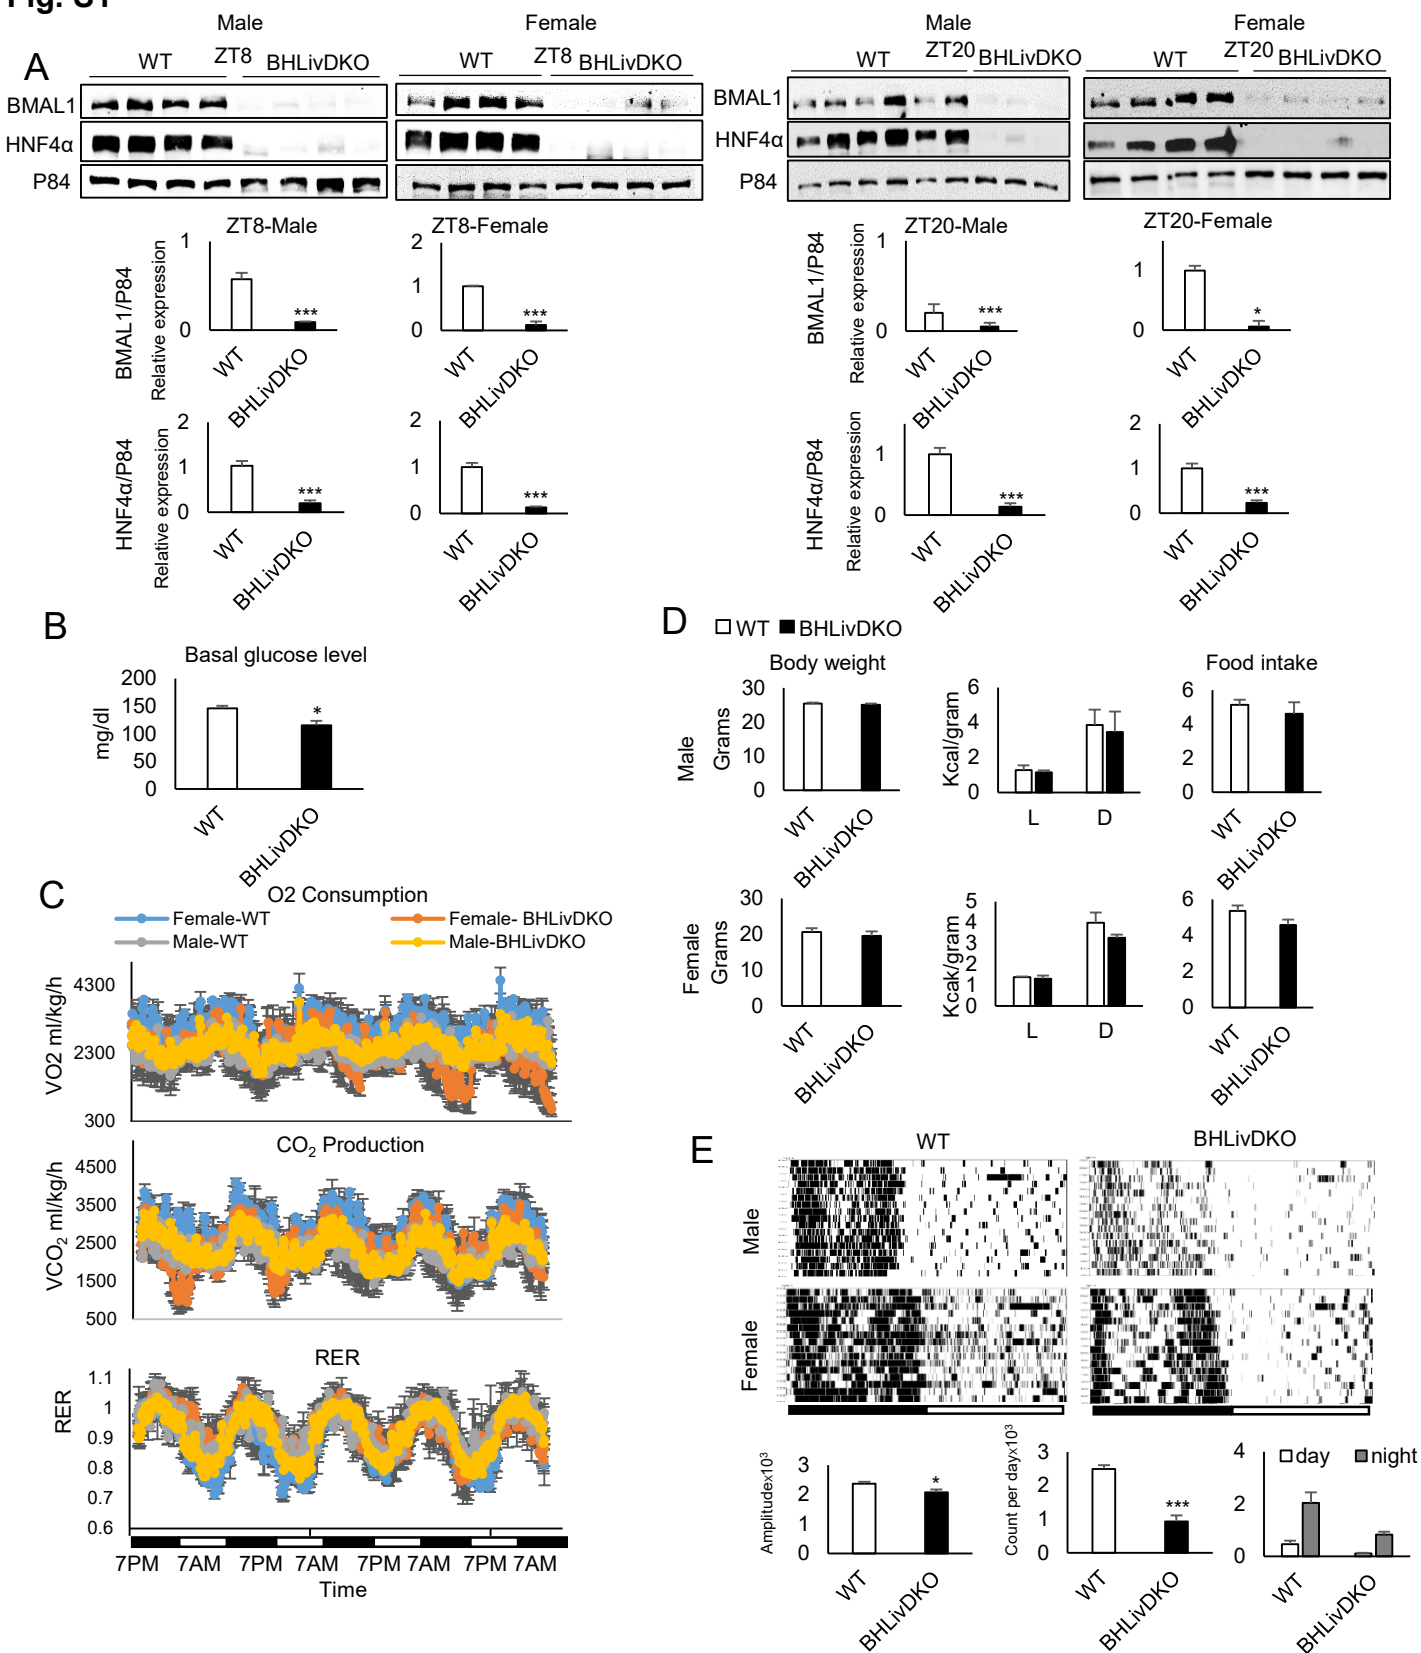

**Fig S1. Loss of BMAL1 and HNF4 $\alpha$  in the liver does not alter diurnal energy expenditure** **A**. Western blot of whole-cell lysates from WT and BHLivDKO livers harvested at ZT8 (left panels) or ZT20 (right panels) reveals total HNF4 $\alpha$ , BMAL1, and p84, 10 days following the first tamoxifen injection in male and female mice. Quantification of the immunoblots normalized to P84 (bottom panels). Student's *t*-test. \* $P \leq 0.05$ ; \*\* $P \leq 0.01$ ; \*\*\* $P \leq 0.001$ . **B**. Basal blood glucose levels in WT and BHLivDKO mice. **C**. Oxygen consumption, carbon dioxide emission, and Respiratory Exchange Ratio of male and female WT and BHLivDKO mice as measured by indirect calorimetry. **D**. Food intake patterns for all WT and BHLivDKO mice during the 24-hour cycle including the light/resting (L) and dark/active (D) phases. **E**. Actograms reveal the home cage activity of WT and BHLivDKO animals (top panel). Quantification (bottom panels). \* $P < 0.05$ , \*\*\*\* $P < 0.0001$  was determined by Mann-Whitney U-test ( $N = 6-8$ ).

**Fig.S2**

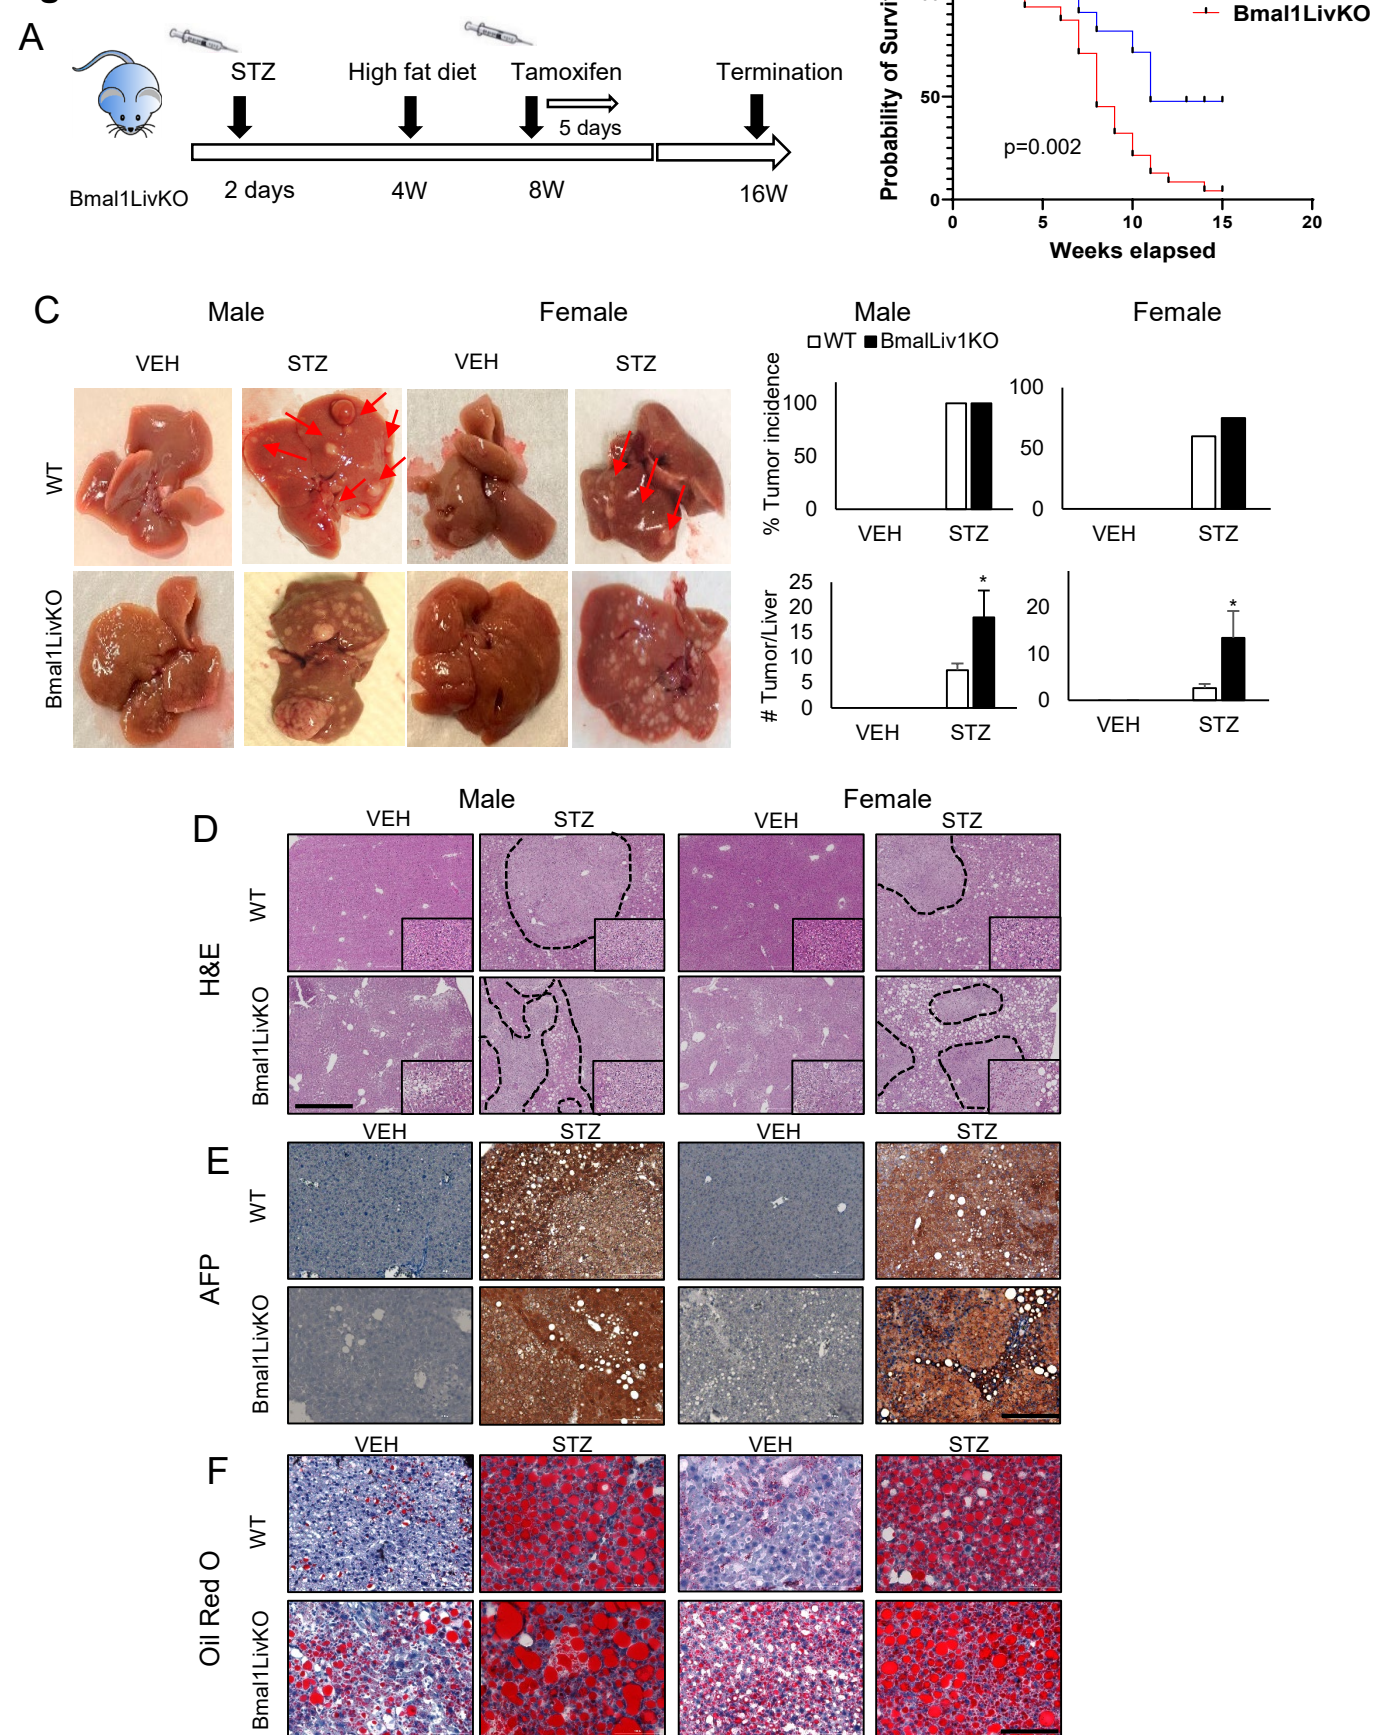

**Fig S2. Mice with hepatic BMAL1 deficiency are more likely to develop hepatocellular carcinoma with a poor survival rate. A.** Experimental timeline for STAM model of HCC in WT and Bmal1LivKO mice. **B.** Kaplan-Meier survival analysis for the WT and Bmal1LivKO mice treated with the streptozotocin (STZ). **C.** Whole livers were taken from mice treated with VEH or STZ followed by HFD, left panel. Percent tumor incidence and the number of tumors per liver per animal group (right panel). **D, E, F.** Staining of livers for H&E, AFP, and Oil Red O respectively (scale bar, 200  $\mu$ m) ( $N = 3-6$ ).

**Fig. S3**

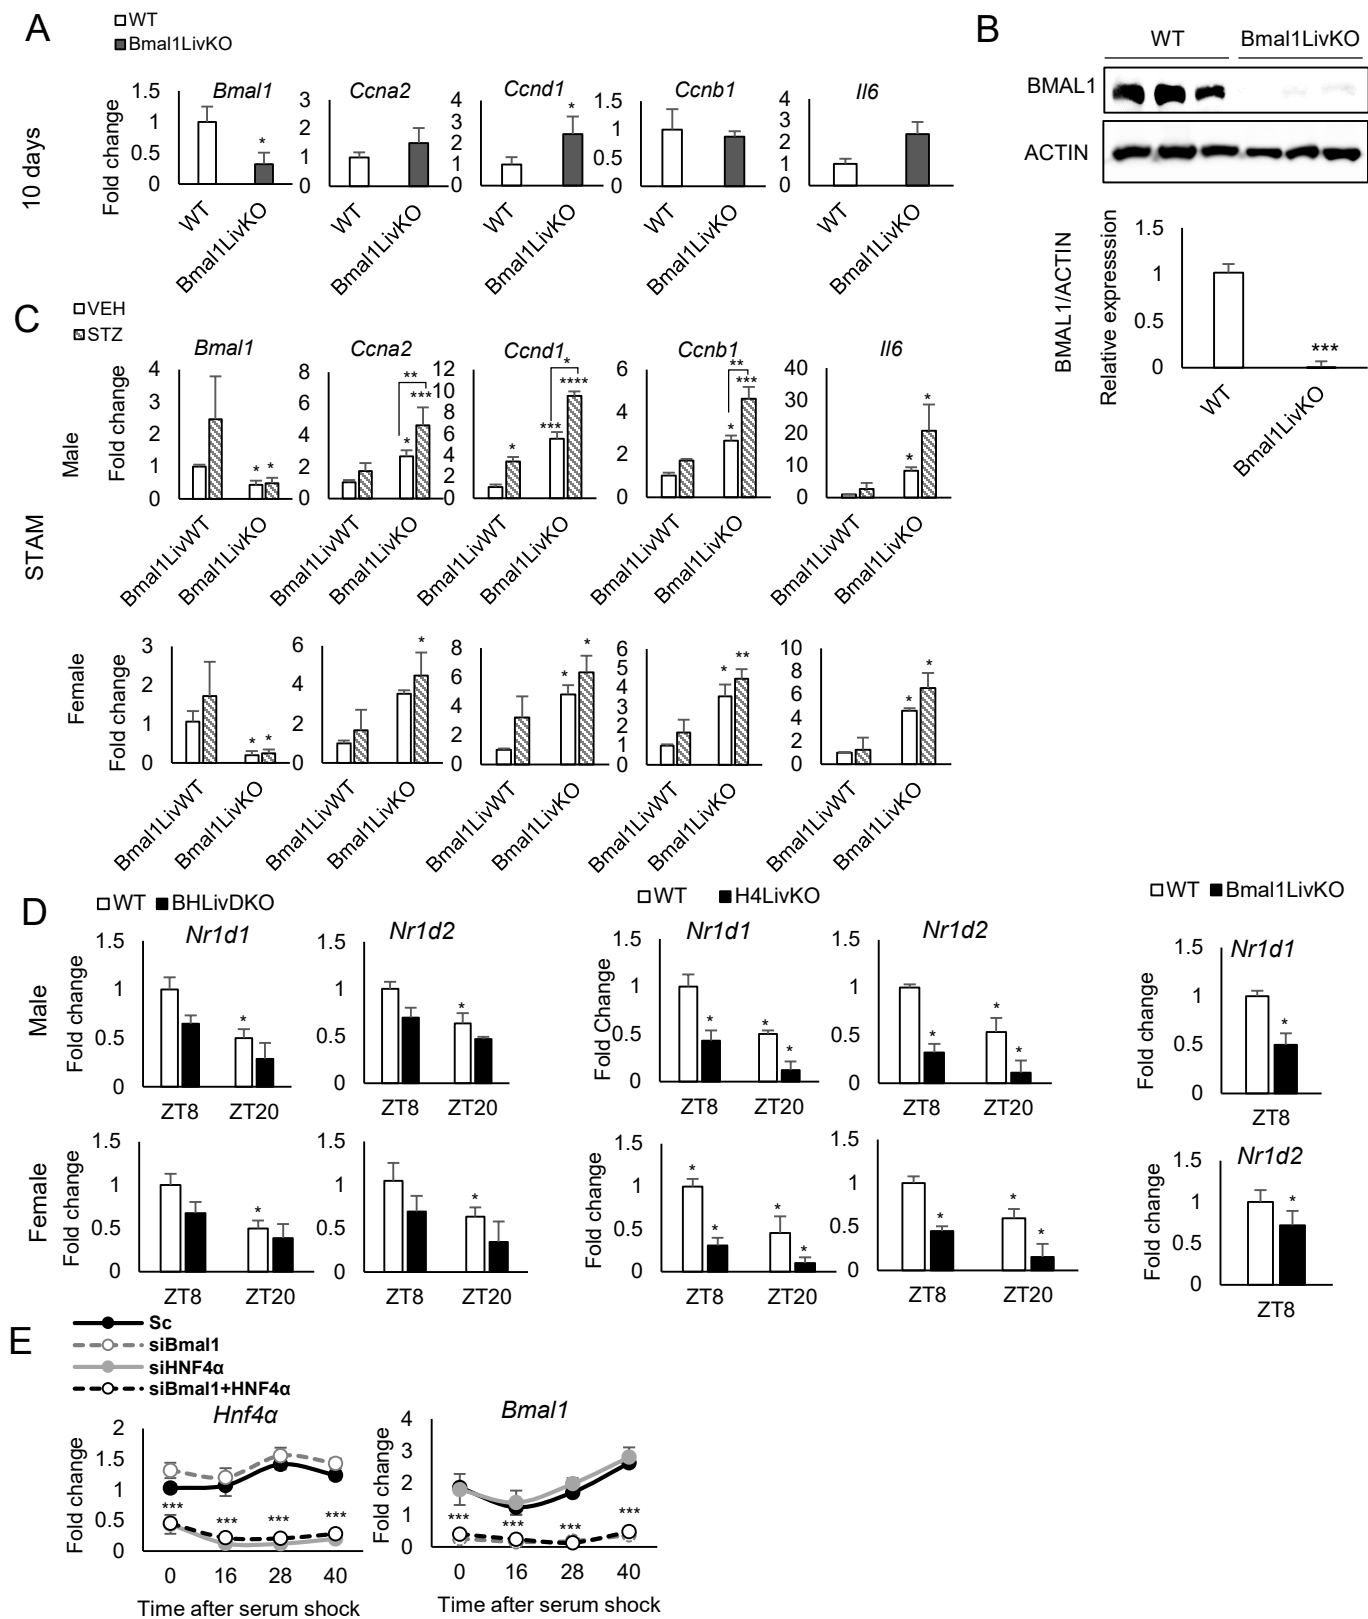

**Fig S3. Loss of hepatic BMAL1 in the STAM model of HCC significantly induce cyclin gene expression.** **A.** *Bmal1*, Cyclins, and *Il6* gene expression in *Bmal1LivKO* 10 days post tamoxifen treatment. **B.** Western blot of BMAL1 and ACTIN protein post tamoxifen treatment. **C.** Expression of *Bmal1*, Cyclins, and *Il6* at mRNA level in *Bmal1LivKO* liver post-VEH/STZ injection in STAM model. two-way ANOVA, Sidak's multiple comparisons test ( $N = 3-6$ ): \* $P \leq 0.05$ ; \*\* $P \leq 0.01$ ; \*\*\* $P \leq 0.001$ . **D.** *Nr1d1* and *Nr1d2* gene expression in the liver of BHLivDKO, H4LivKO and *Bmal1LivKO*, and their WT. **E.** qPCR reveals expression of *Hnf4a*, and *Bmal1* following siRNA or scrambled control. Two-way ANOVA, Sidak's multiple comparisons test ( $N = 6-10$ ). \*\*\*,  $P < 0.0005$ .

**Fig.S4**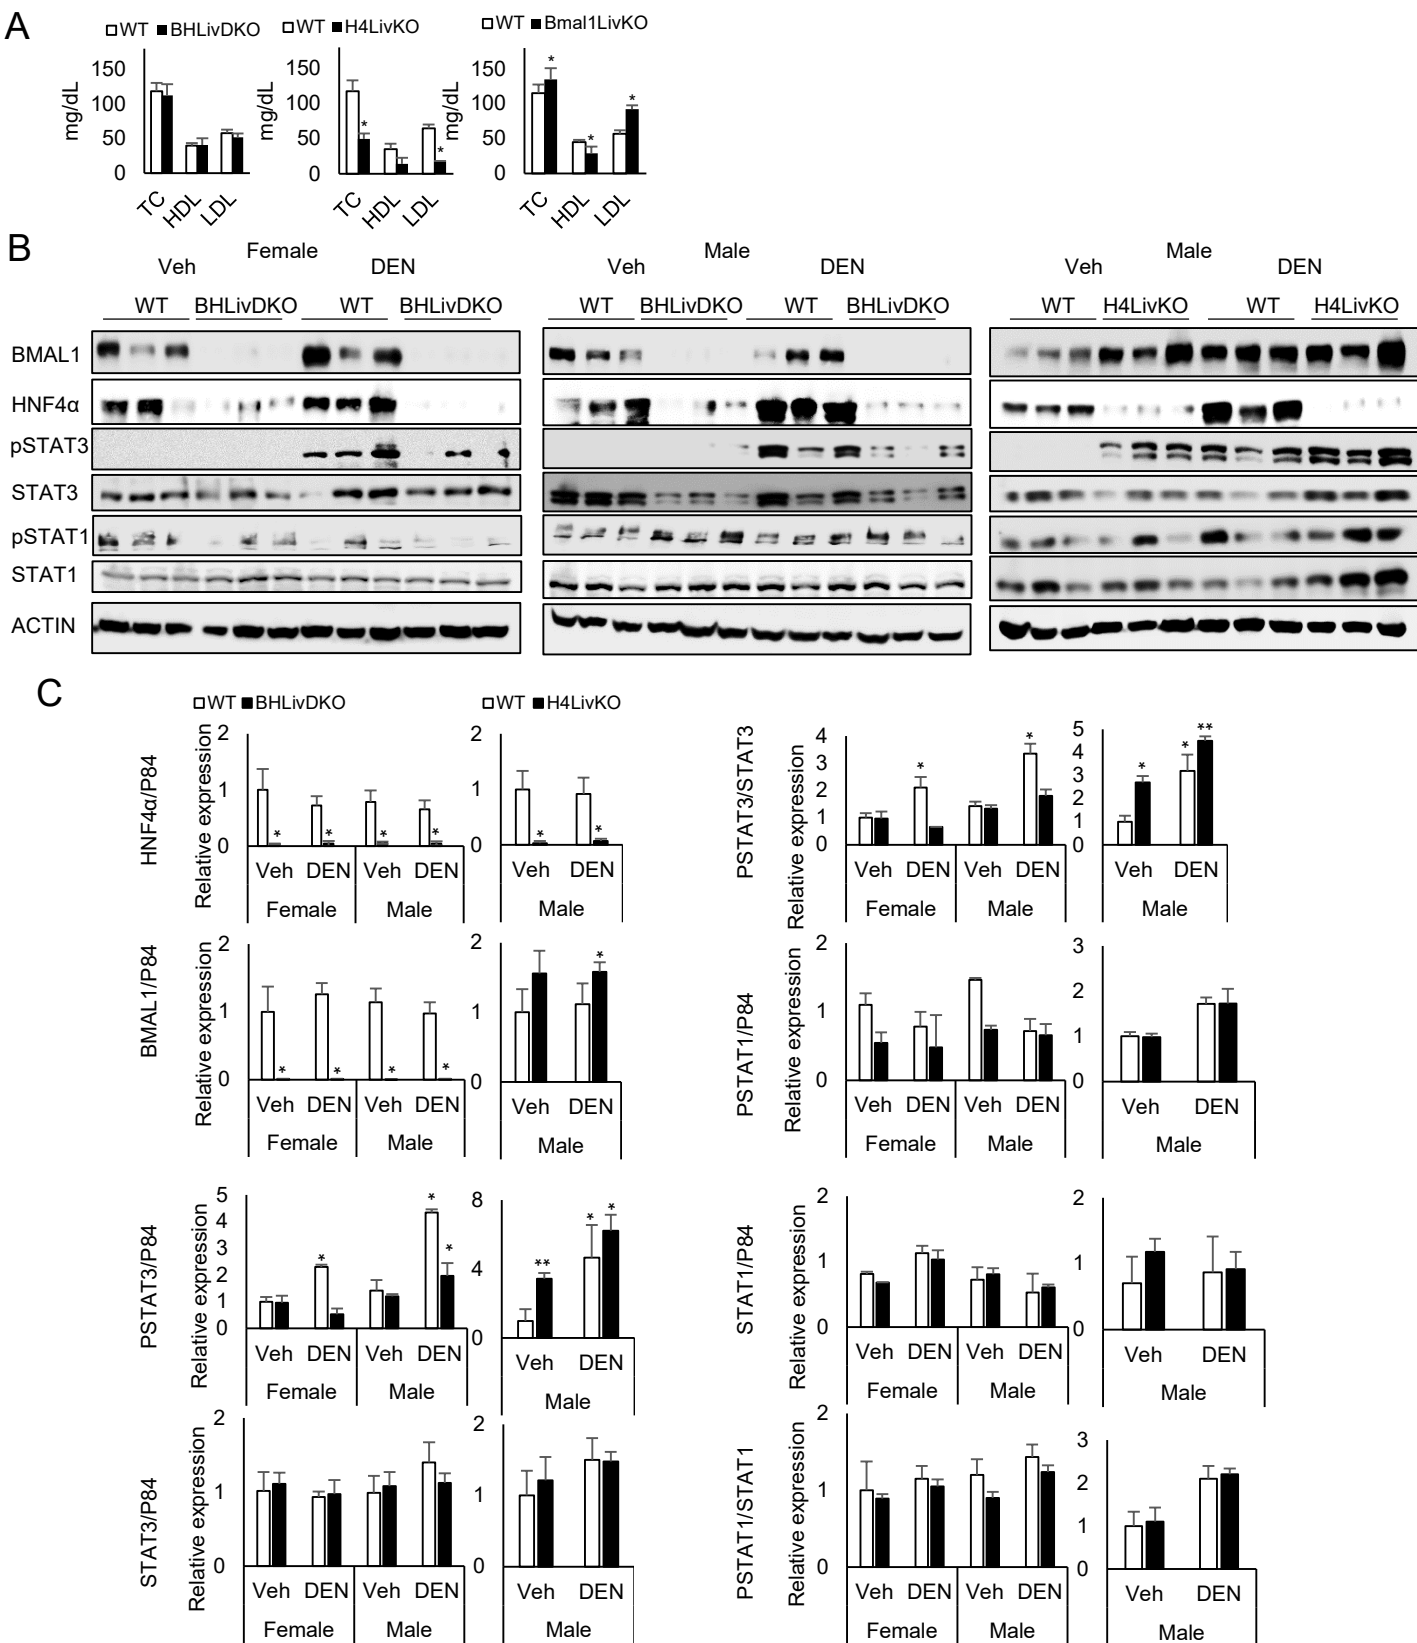

**Fig.S5**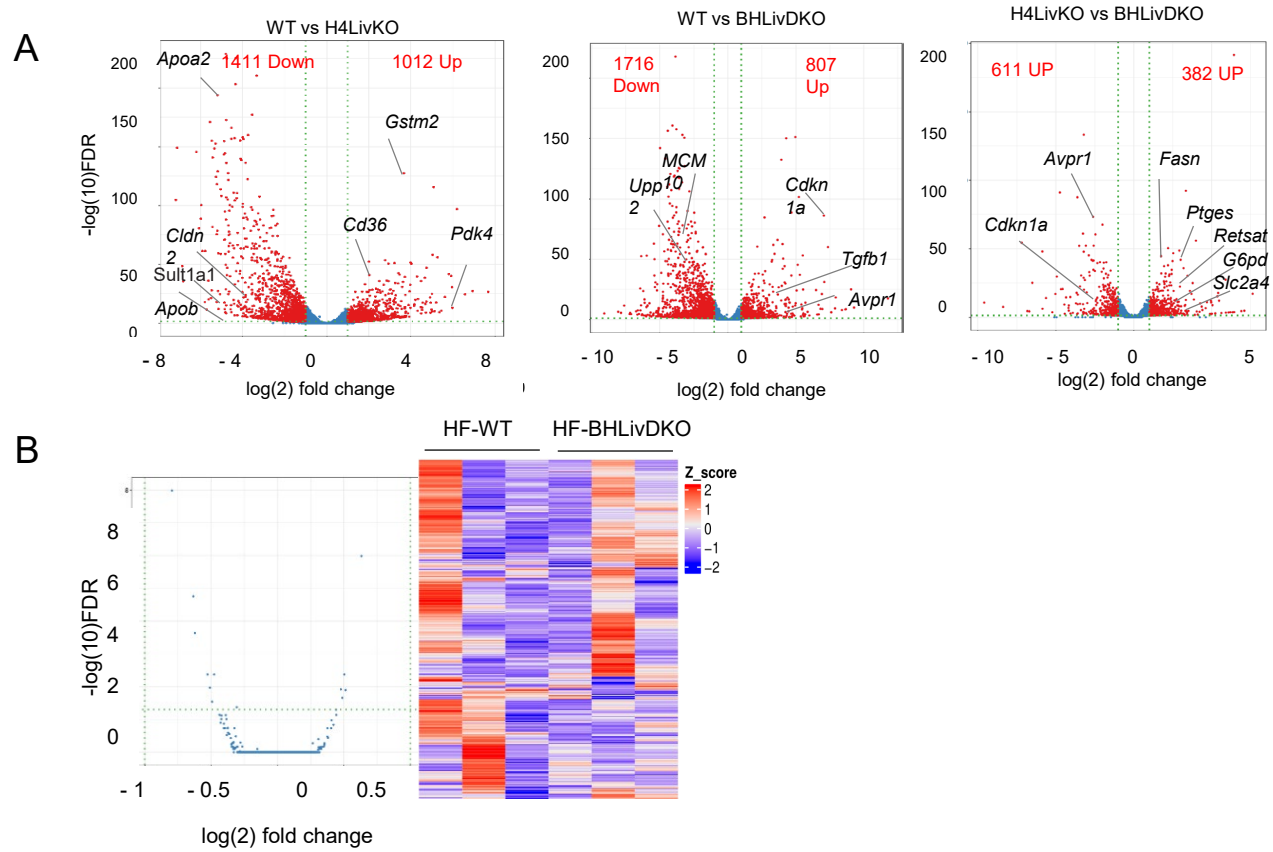

**Fig S5. Distinct gene expression patterns in BHLivDKO livers compared to H4livKO livers. A.** Volcano plots of all genes; the vertical dotted lines indicate the  $|\log_2(\text{fold change})| = 1$ ; the horizontal dotted line denotes the  $-\log_{10}(\text{FDR}) = 1.3$ ; red and blue dots represent the differentially expressed genes (DEGs) and the non-DEGs, respectively; key genes were highlighted in black; the number of upregulated and downregulated DEGs were shown in the top-left and top-right corners, respectively; WT vs. H4LivKO (top left panel), WT vs. BHLivDKO (top right panel) and H4LivKO vs. BHLivDKO (bottom panel) reveals differential gene expression across genotypes ( $N = 3$ ). **B.** Volcano plot of all genes; the vertical dotted lines denote the  $|\log_2(\text{fold change})| = 1$ , the horizontal dotted line indicates the  $-\log_{10}(\text{FDR}) = 1.3$ ; blue dots represent the non-DEGs (left panel), and heat map (right panel) of the relative expression of top 5 percent most variable genes in WT vs. BHLivDKO mice with fed HFD for 45 weeks.

Fig. S6

GO:0016042 lipid catabolic process

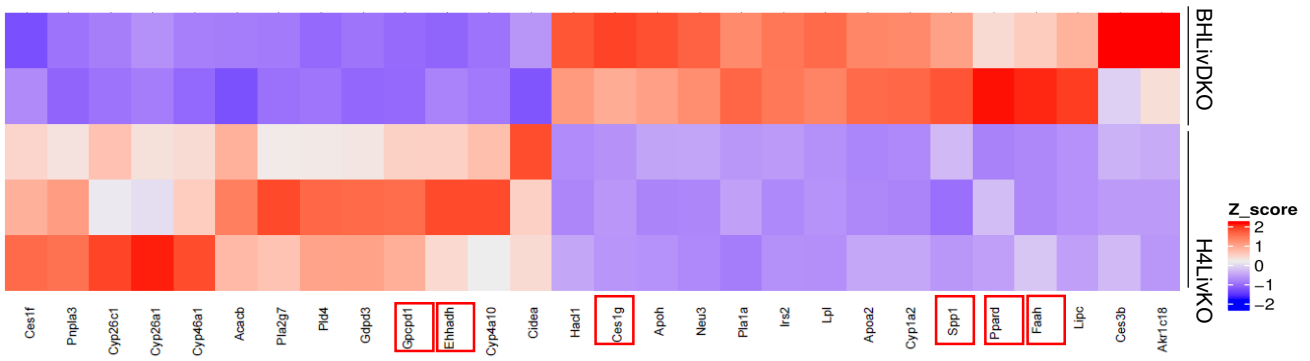

mmu04950 Maturity onset diabetes of the young

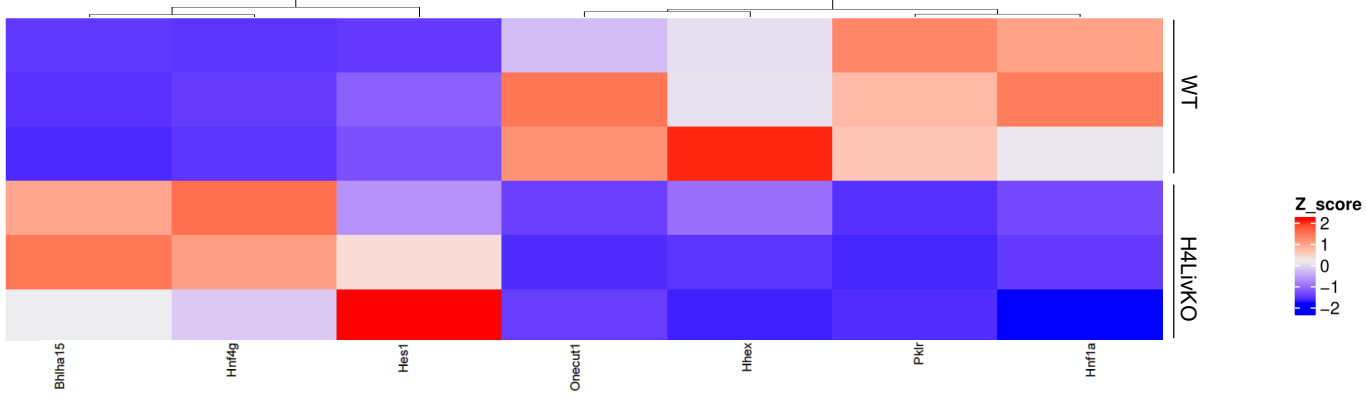

mmu00010 Glycolysis / Gluconeogenesis

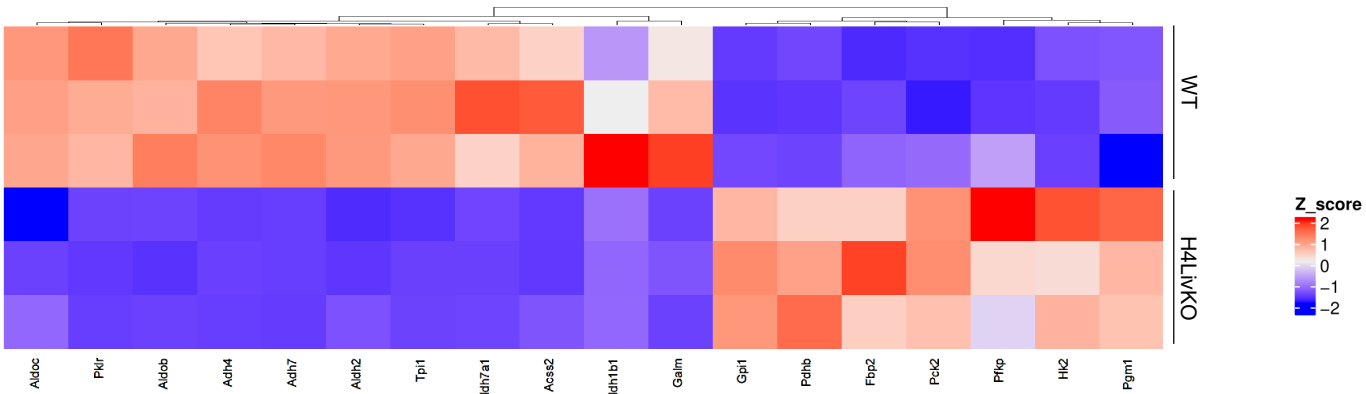

mmu00120 Primary bile acid biosynthesis

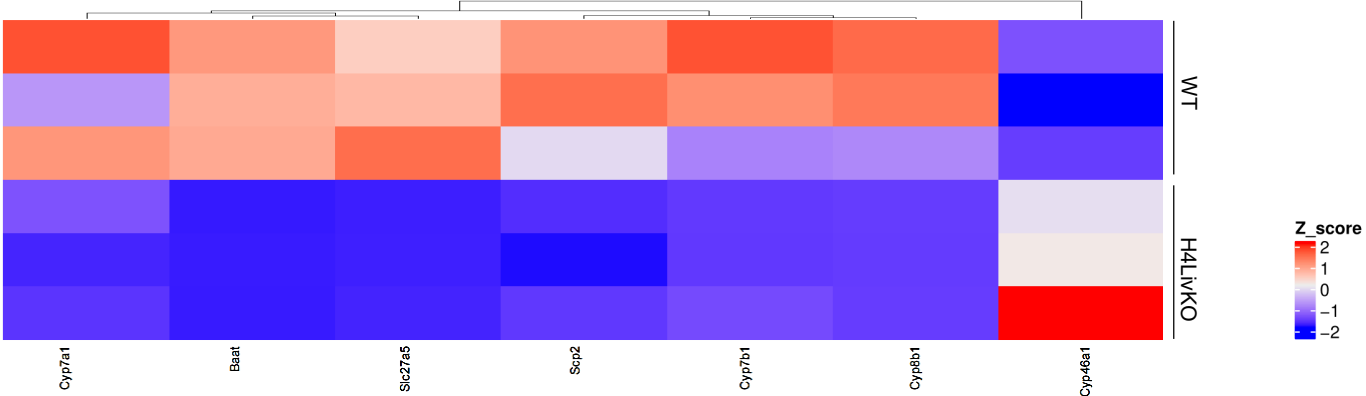

Fig S6. Heat maps showing differentially expressed genes in BHLivDKO vs. H4LivKO and in WT vs.H4LivKO

**Fig. S7**

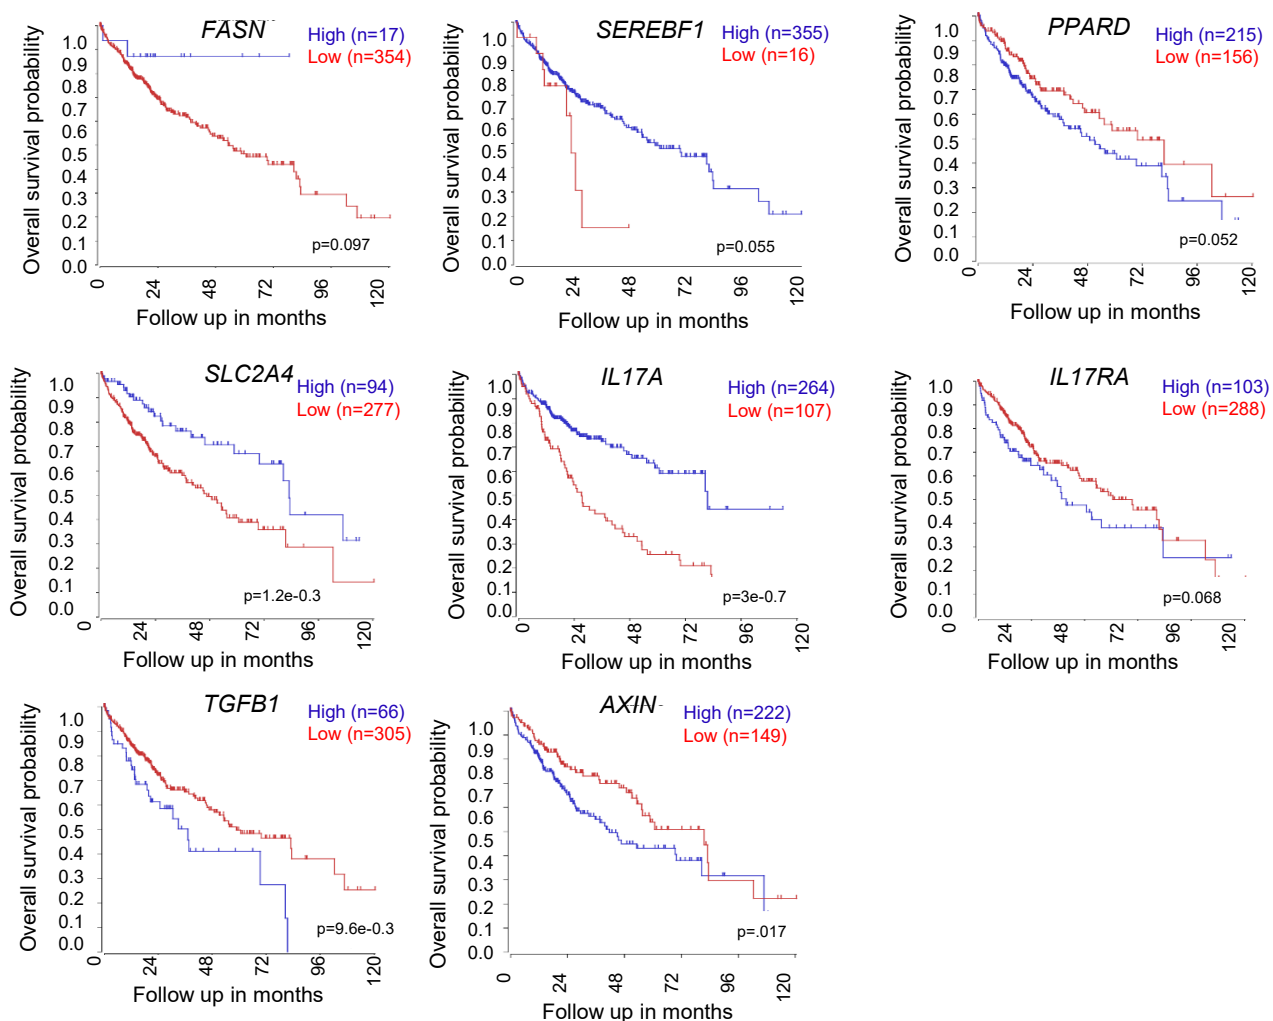

**Fig S7. Kaplan-Meier survival curve for additional genes.** Survival curves show *FASN*, *SEREBF1*, *PPARD*, *SLC2A4*, *IL17A*, *IL17RA*, *TGFB1*, and *AXIN* genes expression using the tumor liver hepatocellular carcinoma (TCGA) LIHC dataset using the R2 Genomics Analysis and Visualization Platform (<http://r2.amc.nl>). Survival time is measured from the time of initial diagnosis to the date of death or the date of the last follow-up. The survival distribution is estimated by the Kaplan-Meier method.  $P < 0.05$  were considered to be statistically significant ( $N = 371$ , 250 Male and 121 Female).

**Fig. S8**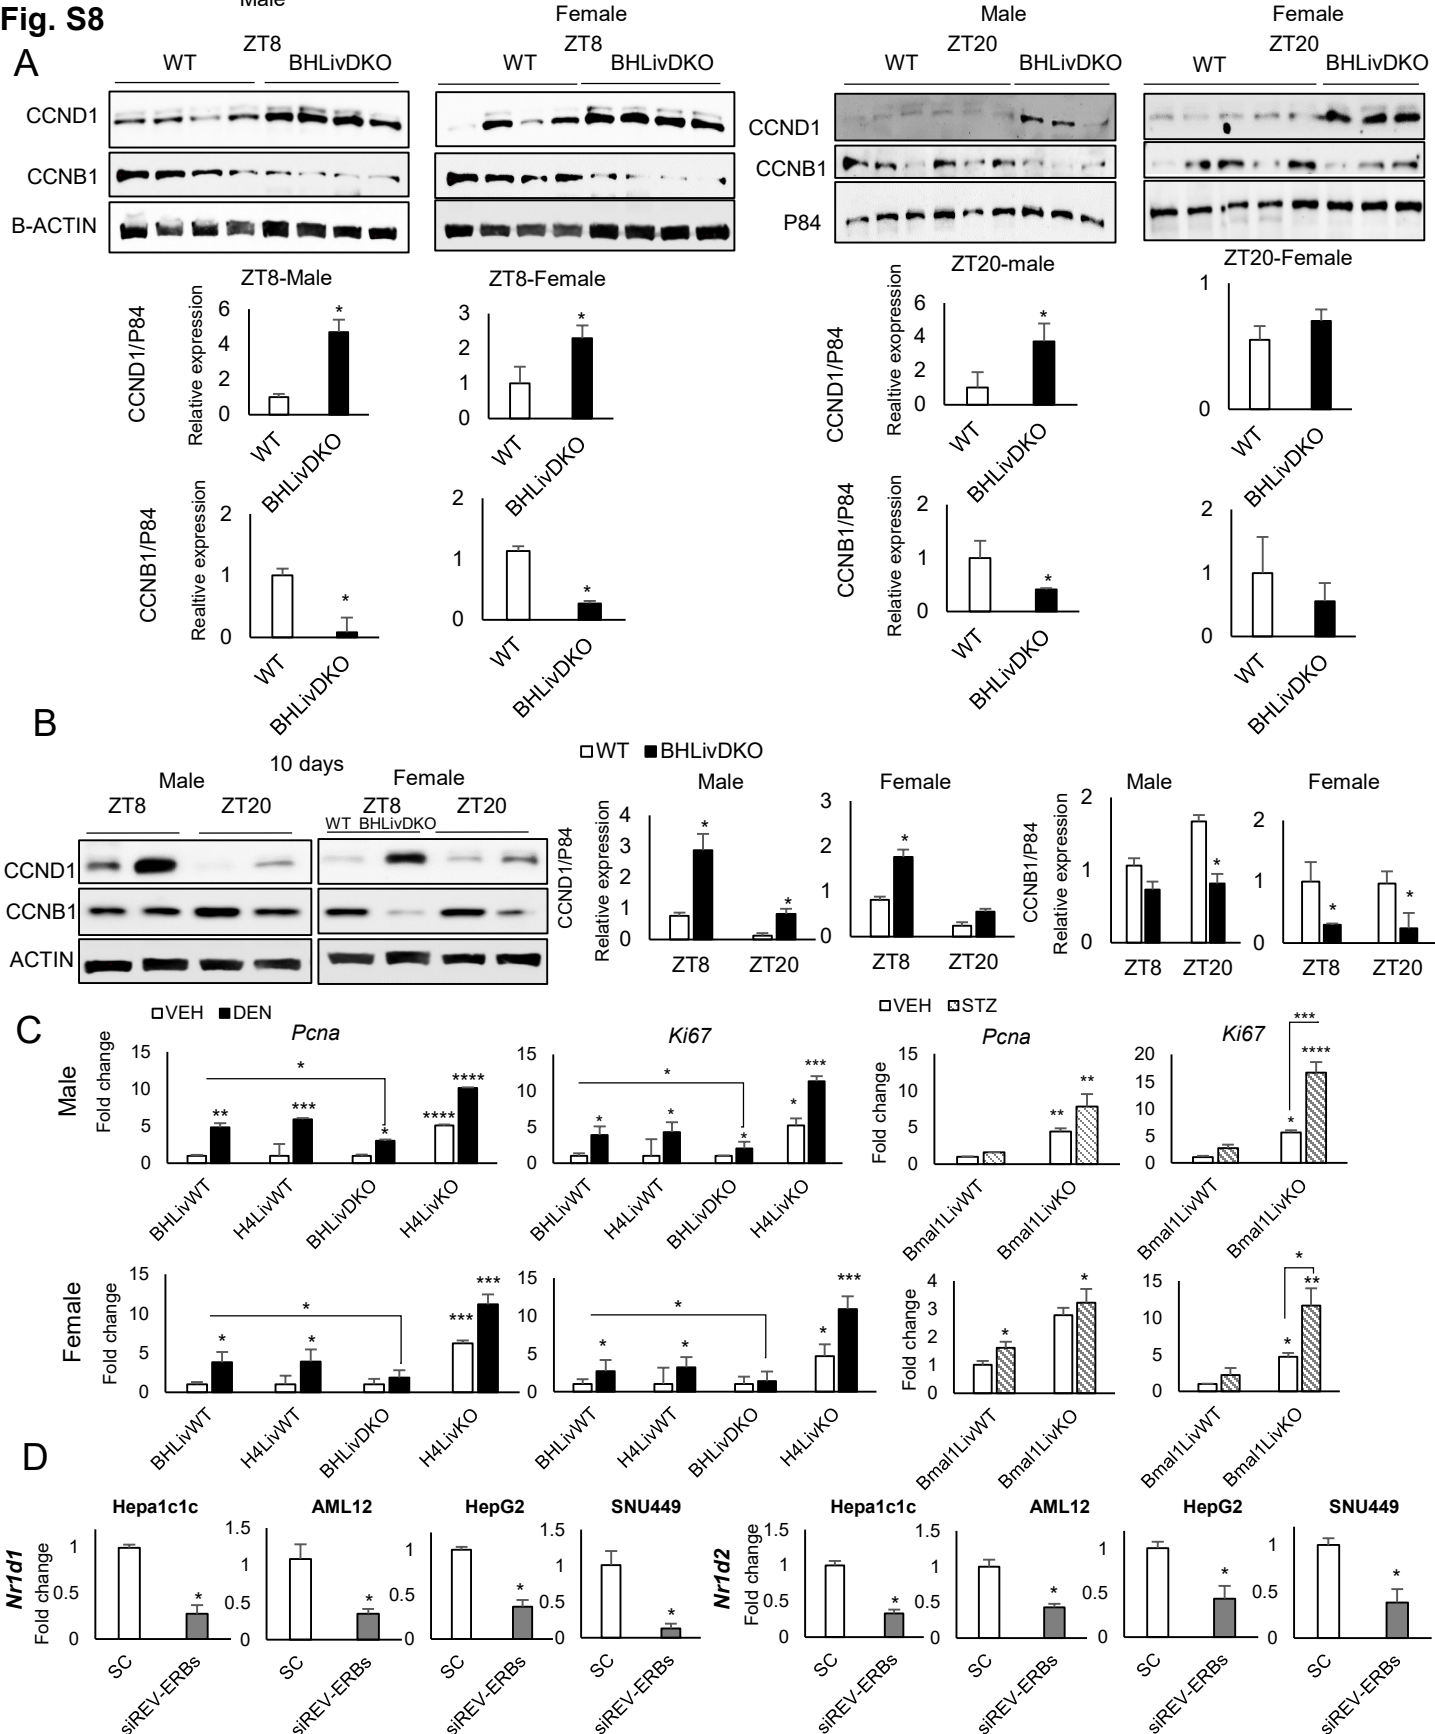



Table S1: Liver evaluation

| Sample ID      | Treatment | fat score | balloning | Mallory | lobular inflammation | Nodule size     | HCC? |
|----------------|-----------|-----------|-----------|---------|----------------------|-----------------|------|
| Male-WT        | DEN       | 2         | 1         | 0       | 1                    | 2.5 mm          | yes  |
|                | DEN       | 1         | 1         | 0       | 0                    | 6 mm            | yes  |
|                | DEN       | 2         | 1         | 0       | 1                    | 1.5mm           | yes  |
|                | DEN       | 2         | 0         | 0       | 1                    | 2 mm and 3 mm   | yes  |
|                | DEN       | 2         | 1         | 0       | 1                    | 2 mm            | yes  |
|                | DEN       | 1         | 0         | 0       | 0                    | 3 mm            | yes  |
|                | DEN       | 1         | 0         | 0       | 1                    | 1 mm x2         | yes  |
| Male-BH livDKO | DEN       | 1         | 0         | 0       | 0                    | 0               | 0    |
|                | DEN       | 1         | 1         | 0       | 0                    | 0               | 0    |
|                | DEN       | 0         | 0         | 0       | 0                    | 0               | 0    |
|                | DEN       | 1         | 1         | 0       | 0                    | 2 mm            | yes  |
|                | DEN       | 0         | 0         | 0       | 0                    | 1.5mm           | yes  |
|                | DEN       | 1         | 1         | 0       | 1                    | 0               | 0    |
|                | DEN       | 2         | 1         | 0       | 1                    | 2 mm            | yes  |
| Male-WT        | VEH       | 1         | 0         | 0       | 1                    | 0               | 0    |
|                | VEH       | 0         | 0         | 0       | 0                    | 0               | 0    |
|                | VEH       | 1         | 0         | 0       | 0                    | 0               | 0    |
|                | VEH       | 1         | 0         | 0       | 1                    | 0               | 0    |
|                | VEH       | 1         | 0         | 0       | 0                    | 0               | 0    |
|                | VEH       | 1         | 0         | 0       | 1                    | 0               | 0    |
|                | VEH       | 1         | 0         | 0       | 0                    | 0               | 0    |
| Male-BHLiv DKO | VEH       | 1         | 0         | 0       | 0                    | 0               | 0    |
|                | VEH       | 1         | 0         | 0       | 1                    | 0               | 0    |
|                | VEH       | 1         | 0         | 0       | 0                    | 0               | 0    |
|                | VEH       | 0         | 0         | 0       | 1                    | 0               | 0    |
|                | VEH       | 1         | 0         | 0       | 1                    | 0               | 0    |
| Male-WT        | DEN       | 1         | 1         | 0       | 0                    | 2 mm            | yes  |
|                | DEN       | 2         | 1         | 0       | 1                    | 2.5 mm          | yes  |
|                | DEN       | 1         | 0         | 0       | 0                    | 3 mm            | yes  |
| Male-H4LivKO   | DEN       | 3         | 2         | yes     | 1                    | 5 mm            | yes  |
|                | DEN       | 2         | 1         | 0       | 2                    | 5 mm            | yes  |
|                | DEN       | 2         | 1         | 0       | 1                    | 5 mm            | yes  |
| Female-WT      | DEN       | 1         | 0         | 0       | 0                    | 1 mm            | yes  |
|                | DEN       | 1         | 1         | 0       | 1                    | 3 mm            | yes  |
|                | DEN       | 1         | 0         | 0       | 0                    | 1 mm            | yes  |
|                | DEN       | 0         | 0         | 0       | 1                    | 0               | 0    |
|                | DEN       | 1         | 0         | 0       | 1                    | 0               | 0    |
|                | DEN       | 0         | 0         | 0       | 0                    | 0               | 0    |
|                | DEN       | 0         | 0         | 0       | 0                    | 0               | 0    |
|                | DEN       | 0         | 0         | 0       | 0                    | 0               | 0    |
| Female-DKO     | DEN       | 3         | 2         | yes     | 1                    | 5.5 mm and 1.5? | yes  |
|                | DEN       | 1         | 0         | 0       | 1                    | 0               | 0    |
|                | DEN       | 1         | 0         | 0       | 1                    | 0               | 0    |
|                | DEN       | 1         | 0         | 1       | 0                    | 0               | 0    |
|                | DEN       | 1         | 1         | 0       | 1                    | 0               | ?    |
|                | DEN       | 3         | 2         | yes     | 2                    | 1 mm            | yes  |
| Female-WT      | VEH       | 1         | 0         | 0       | 1                    | 0               | 0    |
|                | VEH       | 1         | 1         | 0       | 1                    | 0               | 0    |
|                | VEH       | 1         | 0         | 0       | 1                    | 0               | 0    |
|                | VEH       | 0         | 0         | 0       | 0                    | 0               | 0    |
|                | VEH       | 1         | 0         | 0       | 1                    | 0               | 0    |
|                | VEH       | 1         | 0         | 0       | 0                    | 0               | 0    |
|                | VEH       | 1         | 0         | 0       | 1                    | 0               | 0    |
|                | VEH       | 1         | 0         | 0       | 1                    | 0               | 0    |
| Female-DKO     | VEH       | 1         | 0         | 0       | 1                    | 0               | 0    |
|                | VEH       | 1         | 0         | 0       | 0                    | 0               | 0    |
|                | VEH       | 0         | 0         | 0       | 0                    | 0               | 0    |
|                | VEH       | 1         | 1         | 0       | 1                    | 0               | 0    |
|                | VEH       | 1         | 1         | 0       | 0                    | 0               | 0    |
|                | VEH       | 2         | 1         | yes     | 1                    | 0               | 0    |
|                | VEH       | 1         | 0         | 0       | 1                    | 0               | 0    |
| VEH            | 1         | 0         | 0         | 1       | 0                    | 0               |      |

Table S2: Antibodies list

| <b>Name</b>                                      | <b>Catalog # and Company</b>     |
|--------------------------------------------------|----------------------------------|
| <b>P1/P2-HNF4<math>\alpha</math></b>             | #PP-H1415-00 R&D Systems         |
| <b>BMAL1</b>                                     | #93806 Abcam                     |
| <b>CCND1</b>                                     | #EPR2241 Abcam                   |
| <b>CCNB1</b>                                     | #SC-245 Santa Cruz biotechnology |
| <b>ACTIN</b>                                     | # A5441 Sigma                    |
| <b>P84</b>                                       | # GTX70220 GeneTex               |
| <b>STAT1</b>                                     | #9172S Cell signaling            |
| <b>PSTAT1</b>                                    | #9167S Cell signaling            |
| <b>STAT3</b>                                     | #9139S Cell signaling            |
| <b>PSTAT3</b>                                    | #9145S Cell signaling            |
| <b>AFP</b>                                       | #ab46799, Abcam                  |
| <b>Rabbit specific HRP/DAB detection IHC kit</b> | #ab64261, Abcam                  |
| <b>Anti-Mouse-HRP</b>                            | #1706516 BioRad                  |
| <b>Anti-Rabbit-HRP</b>                           | #1791019 BioRad                  |

Table S3: Primers list

| Name                  | Sequences(5' to 3') Mouse    |
|-----------------------|------------------------------|
| P1/P2 HNF4 $\alpha$ F | ACCAAGAGGTCATGGTGT           |
| P1/P2 HNF4 $\alpha$ R | GTGCCGAGGGACGATGTAG          |
| P1HNF4 $\alpha$ F     | CATGGATATGGCCGACTACAG        |
| P1HNF4 $\alpha$ R     | GCCCGAATGTCGCCATTGATCCCAGAGA |
| P2HNF4A F             | GGTACCCTTGGTCATGGTCAGT       |
| P2HNF4 $\alpha$ R     | TGGATGAATTGAGGTTGGCAC        |
| Bmal1 F               | GCAGTGCCACTGACTACCAAGA       |
| Bmal1 R               | TCCTGGACATTGCATTGCAT         |
| DBP F                 | AATGACCTTTGAACCTGATCCCGCT    |
| DBP R                 | GCTCCAGTACTTCTCATCCTTCTGT    |
| Per2 F                | CGCCTAGAATCCCTCCTGAGA        |
| Per2 R                | CCACCGGCCTGTAGGATCT          |
| Pdk4 F                | GAGCTGGTATATCCAGAGCCTGAT     |
| Pdk4 R                | CGAACTTTGACCAGCGTGTCT        |
| CyclinD1 F            | TGCTACCGCACAACGCA            |
| CyclinD1 R            | TCAATCTGTTCCCTGGCAGGC        |
| Cyclin B1 F           | GGAAATCTTGACAACGGTG          |
| Cyclin B1 R           | TGCCTTTGTCACGGCCTTAG         |
| Cdh1 F                | CAAAGTGACGCTGAAGTCCA         |
| Cdh1 R                | TGATGACACGGCATGAGAAT         |
| Snail1 F              | CACCCTCATCTGGGACTCTC         |
| Snail1 R              | CTTCACATCCGAGTGGGTTT         |
| Ctnnb1 F              | ACAAACTGTTTTGAAAATCCA        |
| Ctnnb1 R              | CGAGTCATTGCATACTGTCC         |
| IL17ra F              | TAGTGTTTCCTCTACCCAGCACG      |
| IL17ra R              | AGCCGCTCATTGGTGTTCAG         |
| IL17a F               | CAGACTACCTCAACCGTTCCAC       |
| IL17a R               | TCCAGCTTTCCTCCGCATTGA        |
| Tgfb1F                | AGCCCGAAGCGGACTACTAT         |
| Tgfb1R                | TTCCACATGTTGCTCCACAC         |
| PEG10-F               | CCCCGGGCGCTGGTGTG            |
| PEG10-R               | AGCGGGGCCGGGAGTTTC           |
| GPC3 F                | AGGTAGCTGCGAGGAAAC           |
| GPC3 R                | AGGTCACGTCTTGCTCCTC          |
| R-Spondin2 F          | ATCTGGGGCTCGGTGTCCATAATAC    |
| R-Spondin2 R          | GCGGGTGTCCGCAAACTTTTTTC      |
| Avpr1a F              | CATCCTCTGCTGGACACCTTTC       |
| Avpr1a R              | TCAAGGAAGCCAGTAACGCCGT       |
| Fasn F                | CACAGTGCTCAAAGGACATGCC       |
| Fasn R                | CACCAGGTGTAGTGCCTTCCTC       |
| Ppard F               | GGACCAGAACACACGCTTCCTT       |
| Ppard R               | CCGACATTCCATGTTGAGGCTG       |
| Cdkn1a F              | TGTCCAATCCTGGTGTATGT         |
| Cdkn1a R              | CAACTGCTCACTGTCCAC           |
| Ptges F               | GGAAAGACTGGGAGGATGACTC       |
| Ptges R               | TCATCTGCTCCATCTACTTCTGG      |
| Srebp1 F              | CGACTACATCCGCTTCTTGCGAG      |
| Srebp1 R              | CCTCCATAGACACATCTGTGCC       |
| Slc2a4 F              | GGTGTGGTCAATACGGTCTTCAC      |
| Slc2a4 R              | AGCAGAGCCACGGTCATCAAGA       |
| G6pd                  | CCGCATCATAGTGAGAAACCC        |
| G6pd                  | TGTCCAGGTAGTGGTCAATGCC       |
| Axin2 F               | CTCCTTGGAGGCAAGAGC           |
| Axin2 R               | GGCCACGCAGCACCGCTG           |
| PTEN F                | AATCCCAGTCAGAGGCGCTATGT      |
| PTEN R                | GATTGCAAGTTCCGCCACTGAA CA    |
| Ki67 F                | GCCTTGTGAAGCAGAAGAGAAAAAC    |
| Ki67 R                | CTGGACCTCAAACACCTAACATCAG    |
| PCNA F                | CTGGACCTCAAACACCTAACATCAG    |
| PCNA R                | GCAAACGTTAGGTGAACAGGCTC      |
| 18s F                 | CGCCGCTAGAGGTGAAATTC         |
| 18S R                 | CGAACCTCCGACTTTCGTTCT        |
